# The effect of dispersal and preferential mating on the genetic control of mosquitoes

Doran Khamis<sup>1</sup>, Claire El Mouden<sup>1</sup>, Klodeta Kura<sup>1</sup>, and Michael B. Bonsall<sup>\*1</sup>

<sup>1</sup>*Mathematical Ecology Research Group, Department of Zoology, University of Oxford, South Parks Road, Oxford OX1 3PS, UK*

## Abstract

Mosquito-borne diseases cause significant social and economic damage across much of the globe. New biotechnologies that utilise manipulations of the mosquito genome have been developed to combat disease. The successful implementation of genetic mosquito control technologies may depend upon ecological, evolutionary and environmental factors, as well as the specifications of the chosen technology. Understanding the influence of these external factors will help inform how best to deploy a chosen technology to control vectors of infectious diseases. We use a continuous-time stochastic spatial network model of a mosquito life-cycle coupled to population genetics models to investigate the impact of releasing seven types of genetic control technology: a self-limiting lethal gene, two underdominance threshold gene drives, two homing gene drives and two *Wolbachia* systems. We apply the mathematical framework to understand control interventions of two archetypes of mosquito species: a short-range dispersing *Aedes aegypti* and comparatively longer-range dispersing *Anopheles gambiae*. We show that mosquito dispersal behaviour is an extremely important factor in determining the outcome of a release programme. Assortative mating – where the mating success of genetically modified males is lower than their wild counterparts – can facilitate the spatial containment of gene drives. The rapid evolution of strong mating preference can damage the efficacy of control efforts for all control technologies. We suggest that there cannot be a one-size-fits-all approach to regulation and implementation of vector control; there must be application-specific control plans that take account of understudied ecological, evolutionary and environmental factors.

**Keywords** – gene drive, underdominance, wolbachia, genetic mosquito control, spatial ecology, dispersal, assortative mating, behavioural resistance

---

\*Corresponding author: Michael.Bonsall@zoo.ox.ac.uk

## 27 1 Introduction

28 Mosquito-borne diseases pose a major threat to the health and economies of societies around the world.  
29 More than 80% of the world's population live in areas at risk from a major vector-borne disease such  
30 as malaria, dengue or Zika [69]. Due to increasing insecticide and drug resistance, urbanization and  
31 climate change, the burden of many vector-borne diseases has increased in recent years. In 2016 alone,  
32 Zika cost the Americas' poorest tourism-based economies a devastating \$3.5B [73]. In response to this  
33 social and economic crisis, a range of new biotechnologies are being developed that seek to disrupt vector  
34 populations. These either aim to suppress the mosquito population or to change the genetic makeup of  
35 the wild population so as to render it unable to transmit disease [2]. These technologies fall into two  
36 categories: self-limiting – so called because their effects disappear when releases stop, as the genetic  
37 components are lost from the population – and self-sustaining – intended to persist indefinitely in the  
38 target population after release, possibly increasing in frequency and spreading – which can be further  
39 subdivided into threshold drives, homing drives and naturally occurring proliferative elements like the  
40 intracellular bacteria *Wolbachia* (that spread through the mechanism of cytoplasmic incompatibility).  
41 Self-limiting technologies are undergoing field trials [10, 28], while self-sustaining genetic technologies are  
42 still years from field testing [although *Wolbachia* is already being used with success in the field, 60]. A  
43 fundamental problem for regulators and public health agencies is that the novelty of these technologies  
44 means the potential benefits and risks are only beginning to be understood. A key concern is how  
45 these technologies will spread between mosquito populations in space and time. More generally, a better  
46 understanding of the spatial response of specific vector populations to population suppression attempts  
47 is essential to identify optimal release strategies and important parameters governing release outcomes.  
48 In the absence of trial data, empirically-based models that account for species-specific ecology must help  
49 guide research, regulation and implementation.

50 Research by behavioural biologists and entomologists has shown that the spatial ecology of mosquitoes  
51 is strongly species-specific. This is pertinent for predictions of the performance of control efforts in terms  
52 of spread or containment. *Aedes aegypti* mosquitoes are known to travel only short distances over their  
53 lifetime, with a large percentage living within a single house or moving between neighbouring houses very  
54 infrequently [32, 34]. Conversely, *Anopheles gambiae* mosquitoes regularly move between neighbouring  
55 villages [64, 66], and recent research has shown that they traverse large distances to repopulate arid  
56 regions at the end of the dry season [15]. The difference in these dispersal behaviours must be taken into  
57 account when deciding how best to design and implement genetic control technologies.

58 Many studies have investigated the effect of genetic mosquito control technologies within a single  
59 species from the perspective of spatial spread or containment. The most complex and richly parame-  
60 terised of these used agent-based stochastic modelling approaches, capturing explicit spatial heterogeneity  
61 through the distribution of larval breeding sites [48, 59], blood-feeding sites [56] and bodies of standing wa-  
62 ter [58]. The most simple and intuitive approaches consider the growth and decline in frequency of invad-

63 ing alleles in population genetics frameworks [17, 50]. These complementary modelling approaches have  
64 allowed predictions of the most effective spatial release strategies for various control technologies [38, 46]  
65 when controlling *Aedes aegypti* populations. Other studies have investigated the necessary parameters  
66 for success of gene drive technologies in spatially structured *Anopheles gambiae* populations [22, 56].  
67 Marshall [49] undertook a thorough risk assessment of current control technologies through the lens of  
68 the probability of escape, survival and spread from an ambient field cage, and abstracted to multiple  
69 species of mosquito—however, the theoretical treatment used did not allow modelling of explicit spa-  
70 tial structure, with a later paper suggesting the need for characterization of local ecology before control  
71 strategies are implemented [50]. In the current study, we choose to take aim with our theoretical ap-  
72 proach at the ground between complex agent-based models and simple population genetic models by  
73 utilising a network approach [extended from that developed in 75] to investigate gene flow between and  
74 the effect of control technologies on a mosquito metapopulation. Crucially, our goal is to bridge the gap  
75 between mosquito species by explicitly comparing control technologies for two mosquito archetypes: a  
76 short-range dispersing species (like *Aedes aegypti*) and a comparatively longer-range dispersing species  
77 (like *Anopheles gambiae*).

78 In this work we compare spatial models of seven control technologies via the metric of their efficacy  
79 for two different mosquito species archetypes. The technologies are: a late-acting lethal gene self-limiting  
80 control [1], where transgenic males are released whose offspring die at a late stage of larval development;  
81 two types of engineered underdominance threshold gene drive [16] (a homologous single-locus technology  
82 and a non-homologous system using two loci), which exploit bi-stable gene frequencies (due to heterozy-  
83 gote fitness disadvantage) to drive introduced genes to fixation once their gene frequencies pass a threshold  
84 in the population; two types of homing gene drive [such as those proposed using CRISPR/Cas9 nucleases  
85 26], that uses dynamic gene editing in the germline to drive an introduced gene through a population  
86 at a greater than Mendelian rate (one version in which the drive gene and lethal payload are combined  
87 and one version where the drive component is inherited separately from the lethal gene); and two types  
88 of *Wolbachia*, unidirectional (one bacteria strain) and bidirectional (two strains), which are a natural  
89 maternally inherited drive system causing offspring survival bias through cytoplasmic incompatibility.  
90 There exists no clear comparison of these categories of vector control across different mosquito species  
91 within a consistent ecological and population genetic framework. Further to this, there are several key  
92 ecological, evolutionary and environmental factors that are still poorly understood and are only recently  
93 starting to receive deserved attention. Our study focuses on how dispersal and mating behaviour interact  
94 with imposed fitness costs to impact control efforts using the seven technologies listed above.

95 There is scientific consensus that populations may evolve resistance to these genetic technologies [7, 55].  
96 However, it is unknown if resistance could result from selection for greater female choosiness and if it  
97 can, whether it could evolve rapidly enough to impair the effectiveness of a control effort. At release,  
98 mass-reared males will likely exhibit quite obvious phenotypic differences from the wild strain, so if  
99 this ‘behavioural resistance’ evolves rapidly, females may be able to discriminate between mass reared

100 and wild type. Conversely, if female preference has only a weak influence on mate choice, then male  
 101 competition will be the phenomenon driving mating behaviour, and if released males are less competitive  
 102 than wild males a different sort of behavioural resistance will manifest. Behavioural resistance has been  
 103 observed in many dipteran control programs including screwworm [9], melon fly [35], and medfly [52];  
 104 it can appear within a few generations, and has led to control programs being abandoned [52]. The  
 105 probability of behavioural resistance developing and the potential challenge that it could present for the  
 106 successful application of genetic control in mosquitoes is unknown. Both possibilities – female choosiness  
 107 and male competitiveness – will impact on the mating success of genetically modified males with wild  
 108 females, and we investigate this here.

109 Here, we use coupled continuous-time ecological and population genetics models on a spatial network  
 110 to compare the impact of a self-limiting technology, underdominance threshold drives, homing-based  
 111 gene drives and *Wolbachia* drives on wild mosquito populations of two distinct archetypal species. We  
 112 investigate conditions for successful suppression or replacement, either global or contained, across a  
 113 network of randomly generated villages (or neighbourhoods) under the influence of changing ecological,  
 114 evolutionary and genetic pressures.

## 115 2 Methods

We use a stage-structured population model for the mosquito, taking into account an aquatic juvenile stage ( $B$ ) and an adult stage ( $N$ ). The dynamics are captured by the following set of ordinary differential equations:

$$\frac{dB_r^{(i)}}{dt} = \rho p_r^{(i)} N_r^f - (f_r(B_r^t) + m + \mu^B) B_r^{(i)}, \quad (2.1a)$$

$$\frac{d\hat{B}_r^{(i)}}{dt} = \rho p_r^{(i)} N_r^f - (f_r(B_r^t) + m + \mu^B) \hat{B}_r^{(i)}, \quad (2.1b)$$

$$\frac{dN_r^{(i)}}{dt} = m B_r^{(i)} \phi^{(i)} - \mu N_r^{(i)} - \delta_r^{c1} E N_r^{(i)} + \sum_{l \neq k} \bar{\sigma}_{kl} E N_l^{(i)}, \quad (2.1c)$$

$$\frac{d\hat{N}_r^{(i)}}{dt} = m \hat{B}_r^{(i)} \hat{\phi}^{(i)} - \mu \hat{N}_r^{(i)} + \delta^{iR} N_r^{(1)*} u_r - \delta_r^{c1} \hat{E} \hat{N}_r^{(i)} + \sum_{s \neq r} \bar{\sigma}_{rs} \hat{E} \hat{N}_s^{(i)}. \quad (2.1d)$$

116 A superscript “ $(i)$ ” denotes genotype; a subscript “ $r$ ” denotes the spatial site (or network node); a hat  
 117 denotes males or male-specific quantities. Thus,  $N_r^{(i)}$  represents adult females of genotype  $i$  at node  $r$   
 118 and  $p_r^{(i)}$  is the proportion of offspring of genotype  $i$  at node  $r$  that arise from the genetic mating crosses  
 119 (we assume an equal sex ratio for all offspring). In (2.1),  $\rho$  is the oviposition rate of the adult females,  
 120  $m$  is the rate at which larva mature into adults and  $\mu$  and  $\mu^B$  are the density-independent mortality  
 121 rates for adults and juveniles, respectively. For simplicity, we assume that these life history parameters  
 122 ( $\rho$ ,  $m$ ,  $\mu$  and  $\mu^B$ ) are homogeneous across spatial sites and genotype (though this will not be the case  
 123 in general, and relaxing this assumption would allow an interesting investigation of heterogeneity to be

124 performed). The Kronecker delta  $\delta^{iR}$  ensures released mosquitoes are of the correct genotype, labelled  
 125 “ $R$ ” here. The number of mosquitoes released per day is  $u_r$ . The sum of all male and female larvae is

$$B_r^t = \sum_{i=0}^{n_g} [B_r^{(i)} + \hat{B}_r^{(i)}], \quad (2.2)$$

126 where  $n_g$  is the number of genotypes (which is technology dependent), while the sum of adult females is  
 127  $N_r^f$ . The Kronecker delta  $\delta_r^c$  is equal to one ( $c = 1$ ) if connections to other nodes from node  $r$  are open  
 128 and zero ( $c \neq 1$ ) if node  $r$  is unconnected (movement of mosquitoes is discussed further below and in  
 129 appendix S1a). Parameter values and definitions are listed in table 1.

130 The fitness costs  $\phi^{(i)}$  and  $\hat{\phi}^{(i)}$ , which may differ, act at the end of the pupal stage, allowing all  
 131 larvae to compete for resources in the larval habitat. This reduces the risk of unintended population  
 132 rebound [over-compensatory density dependence acting to increase the reproductive fitness of a cohort  
 133 maturing in a less competitive environment 4, 74]. Fitness costs imposed by modified alleles (either  
 134 intended lethal payloads or the ambient burden of carrying a transgene) combine multiplicatively (aside  
 135 from when combinations of transgenes suppress lethal effects, as in the underdominance systems). For  
 136 instance, work has shown that density-dependent effects can have important implications for the spread  
 137 of *Wolbachia* in mosquitoes [30, 31]. The density dependence experienced by larvae at node  $r$  is given by  
 138 [51]

$$f_r(B_r^t) = \ln [1 + (\nu_r B_r^t)^\eta], \quad (2.3)$$

139 where  $\nu_r$  is inversely proportional to the carrying capacity at node  $r$  and  $\eta$  governs the approach rate to  
 140 the carrying capacity. The wild-type carrying capacity is defined through the vector-to-host ratio  $k_r^*$  and  
 141 a nominal host population  $H$  per node:  $N_r^{(1*)} = k_r^* H$  (with the superscript  $*$  denoting the equilibrium  
 142 value). The human population  $H$  is assumed constant and equal at all nodes, though in this model  $H$   
 143 acts purely as a multiplicative constant in the density dependent regulation (i.e. we are not implying a  
 144 mechanistic relationship that causes  $H$  to limit the vector population;  $H$  is just used as a mathematical  
 145 convenience to set the scale for the simulations). The density dependence parameters act to enforce this  
 146 equilibrium population through the definition

$$\nu_r = \frac{m}{2k_r^* H \mu} \left( e^{\{\rho m / (2\mu) - m - \mu^B\}} - 1 \right)^{\frac{1}{\eta}}, \quad (2.4)$$

147 which holds separately at each node  $r$  (possibly producing different values of  $\nu_r$ ). Seasonality and localised  
 148 environmental stochasticity (node-to-node heterogeneity) is captured by changing  $k_r^*$  stochastically and  
 149 periodically (using a noisy sinusoidal signal bounded above a small value, see appendix S1b).

150 Movement of adult mosquitoes between nodes (described by the movement weighting matrix  $\bar{\sigma}$  in  
 151 (2.1)) is treated stochastically, with connections between pairs of nodes opening and closing each day  
 152 as governed by a Gaussian probability distribution dependent on the distance between the nodes [see  
 153 appendix S1a and 75]. The opening and closing of connections between nodes can be thought of as

154 capturing physical events such as the closing of a window or door between neighbouring nodes or a strong  
 155 wind or heavy shower preventing travel between distant nodes. The distribution of migrants from a given  
 156 node among all the available connections is governed by the species-specific Laplacian dispersal kernels  
 157 (appendix S1a). A percentage of the vector population at a given home site will move each day when at  
 158 least one connection to a target site is open, with that percentage sampled randomly for each node on  
 159 each day from a fixed Gaussian distribution. The variation in distance from a home site to multiple valid  
 160 target sites governs how the migrants are spread between the target sites, with closer sites receiving more  
 161 migrants. The distance between sites also dictates whether the path between the sites will be open. If  
 162 no paths are open, no migration occurs and the dispersal rate is (temporarily) zero. Shorter paths are  
 163 more likely to be open, meaning dispersal to close targets occurs at a higher rate. The number of open  
 164 connections per node is capped at thirty.

**Table 1** Ecological model and release strategy parameter definitions and values for the two archetypal mosquito species.

| Symbol  | Description                                                           | <i>Aedes</i>          | <i>Anopheles</i>    | Notes                                                                                 |
|---------|-----------------------------------------------------------------------|-----------------------|---------------------|---------------------------------------------------------------------------------------|
| $\rho$  | daily per adult female oviposition rate                               | 16                    | $\frac{52}{3}$      | [20, 62, 63]                                                                          |
| $m$     | daily larval maturation rate                                          | $-\ln \frac{13}{15}$  | $-\ln \frac{9}{10}$ | [6, 36, 45]                                                                           |
| $\mu$   | daily adult mosquito death rate                                       | $-\ln \frac{88}{100}$ | $-\ln 0.925$        | [13, 18, 21, 24, 25, 44, 53, 54]                                                      |
| $\mu_B$ | daily density-independent larval death rate                           | $-\ln 0.985$          | $-\ln 0.9805$       | [39, 43, 45]                                                                          |
| $\eta$  | strength of density dependence                                        | 0.9                   | 0.9                 | $\eta < 1$ implies contest-type density dependence                                    |
| $\nu$   | scale of larval density-dependence                                    | eq. (2.4),(S1.6)      | eq. (2.4),(S1.6)    | regulates seasonal population fluctuations                                            |
| $k^*$   | Average vector-to-host ratio                                          | 15                    | -                   | Undergoes seasonal and stochastic variation, see appendix S1b                         |
| $H$     | Nominal host population per node                                      | 4                     | -                   | We do not model host-vector interaction, this just sets the scale of the computations |
| $u$     | Weekly release size                                                   | 2000                  | -                   | Spread over four nodes of Village 1, see appendix S2                                  |
| $c_1$   | Ambient fitness cost of carrying a single modified allele             | 0.05                  | -                   | Fitness costs combine multiplicatively (appendix S2)                                  |
| $c_2$   | Female-specific lethality efficiency of carrying single lethal allele | 0.85                  | -                   | Fitness costs combine multiplicatively (appendix S2)                                  |

165 The action of each genetic control technology is captured in the population genetics model, which ac-  
 166 counts for homing rates (the efficiency with which a gene drive heterozygote is converted into a gene drive  
 167 homozygote), lethality efficiencies (of the genetic construct designed to cause population suppression),  
 168 unintended fitness costs (of carrying a genetic modification) and female wild-type mating preferences.  
 169 The number of possible genotypes is dictated by the control technology chosen (see appendix S3). Mat-  
 170 ing preference of wild-type females is defined as the fraction of females that, upon coming into contact

171 with a male of a non-wild genotype (homozygotes or heterozygotes of modified alleles), will instead mate  
172 with a wild (homozygous) male (see appendix S3a). The mechanism for the preference is not assumed:  
173 the resulting skew in offspring proportion could be achieved, for example, through explicit female choice  
174 (phenotypic preference); through a reduced ability of genetically modified males to compete for mates  
175 with wild males; or due to a combination of these (or other) factors. We assume each control technol-  
176 ogy results in female-specific lethality (allowing for the unique effect of *Wolbachia*), but also imposes an  
177 unintended, ambient fitness cost which is borne by those mosquitoes of either sex that carry the transgene.

178 Simulations span three years, with control implemented after the first year to allow the system to  
179 reach its natural equilibrium. The spatial structure of the network (shown in Supplementary Information  
180 fig. S1) consists of a square domain of area 5km<sup>2</sup> containing three villages (or neighbourhoods) of fifty  
181 houses (nodes, acting as mosquito breeding sites) each (Village 2 close to Village 1; Village 3 far from  
182 Village 1 but close to Village 2), with the positions of the houses randomly generated each time the model  
183 is run. The model was written in C++ and source code is available at <https://osf.io/4f9jk/>.

### 184 3 Results

185 We investigate how dispersal, mating success and genetic fitness costs affect the performance of seven pop-  
186 ulation suppression technologies: a self-limiting technology (SL), two underdominance threshold drives –  
187 homologous (UD) and non-homologous (NHUD) – two homing gene drives – combined homing and lethal  
188 gene (CGD) and separated homing and lethal genes (SGD) – and two cytoplasmic incompatibility drives  
189 – unidirectional *Wolbachia* (WBU) and bidirectional *Wolbachia* (WBB). Importantly, we investigate how  
190 these results differ between a short-range dispersing species like *Aedes aegypti* (Ae) and a comparatively  
191 longer-range dispersing species like *Anopheles gambiae* (An). Also investigated is how the disparate  
192 population sizes of the *Anopheles* compared with the *Aedes* mosquito (*Anopheles* can have effective pop-  
193 ulation sizes larger by a factor of many thousands) affects control efforts. Resistance and invasiveness is  
194 then studied by simulating the development of behavioural and genetic resistance to control efforts; the  
195 invasiveness of *Wolbachia* drives is studied in the context of the possibility of a positive fitness bias.

196 Fitness costs are modelled as a reduction in the probability that a mosquito will reach reproductive  
197 age. We consider two types of fitness cost: intended action and unintended burden. The intended  
198 fitness costs are those that result from the desired phenotypic consequences of the control technology  
199 (the lethality efficiency) and we assume these only affect females (female-specific lethality) barring the  
200 specific action of cytoplasmic incompatibility; the unintended, or ambient, costs arise as a consequence of  
201 carrying a modified gene (such as increased mutagenesis or unforeseen phenotypic effects) and are borne  
202 equally by both sexes. Often only the lethality efficiency of a technology is studied; we also investigate  
203 the effect of the ambient fitness cost for several reasons: (i) it should be possible to adapt the design of  
204 genetic technologies to control, at least partly, this parameter; (ii) the relative fitness of the transgenic  
205 mosquito is a key parameter governing its establishment and persistence [e.g. 8]; (iii) testing a range of



206 unintended fitness costs hints at the macroscopic effects of the likely build-up of off-target cutting and  
207 resulting deleterious mutations when CRISPR/Cas drive systems are used [12, 76]; and (iv) the ambient  
208 cost has been shown to be often more important than the lethality efficiency in governing the success of  
209 a control strategy [40].

210 In all following results, we use a release strategy of weekly pulses of 2000 modified males, spread  
211 over four equidistant release sites equally spaced between the centre of Village 1 and the village edge  
212 (in a square pattern), for one year. (The experiments and reasoning that led to this choice can be  
213 found in appendix S2). Releases are then stopped, and the simulations are continued for a year to  
214 examine whether and how the vector population rebounds after control is ceased. In the case of the  
215 *Wolbachia* systems, both modified males and females are released by necessity, and releases are spread  
216 equally between both sexes in the unidirectional system and between both sexes and both *Wolbachia*  
217 strains in the bidirectional system. We study genetic controls designed both for population suppression  
218 and replacement. Suppression is the reduction of the abundance of a target population; replacement  
219 systems aim to make the vector more refractory to the pathogen they carry. In this study, we use  
220 the word “suppression” in the case of the suppressive technologies (self-limiting, homing gene drives) to  
221 mean the reduction in abundance of total female numbers irrespective of genotype, while in the case  
222 of replacement-focussed technologies (underdominance drives and *Wolbachia*) we mean the reduction in  
223 abundance of wild-type females only (the modified females are assumed by the mechanism specific to the  
224 system to be ineffective vectors of disease). Results are colour coded green (triangles), blue (squares) and  
225 red (squares) to indicate suppression in Village 1, Villages 1 and 2, and Villages 1, 2 and 3, respectively.  
226 Further colour coding indicates whether suppression is temporary (light, year of control only) or lasting  
227 (dark, both year of control and year after). Gold colouring indicates that suppression was delayed until  
228 the year after the control period (for example a gold square denotes suppression in all three villages that  
229 takes effect the year after releases cease, while a gold triangle denotes suppression in Village 1 the year  
230 after releases cease). Black circles denote simulations wherein no suppression is achieved in any village.

### 231 3.1 Dispersal

232 Understanding the dispersal behaviour of a mosquito species is vitally important to be able to predict the  
233 spatial spread of a released genetic modification. We simulate control efforts for an “average” mosquito  
234 species (all life history parameters are taken as the mean of those of the *Ae. aegypti* and *An. gambiae*  
235 listed in table 1), and vary the ‘dispersal level’ of this species, which changes the migration distance  
236 probability distribution (appendix S1a). At a dispersal level of 0.25, the migration distance matches that  
237 of the *Aedes* archetype; at a dispersal level of 0.75 the migration distance matches that of the *Anopheles*  
238 archetype. The dispersal level also changes the probability distribution governing the fraction of the  
239 population of a node that migrate each day, and linearly scales between 0% and 15% for dispersal levels  
240 in  $[0, 1]$ .



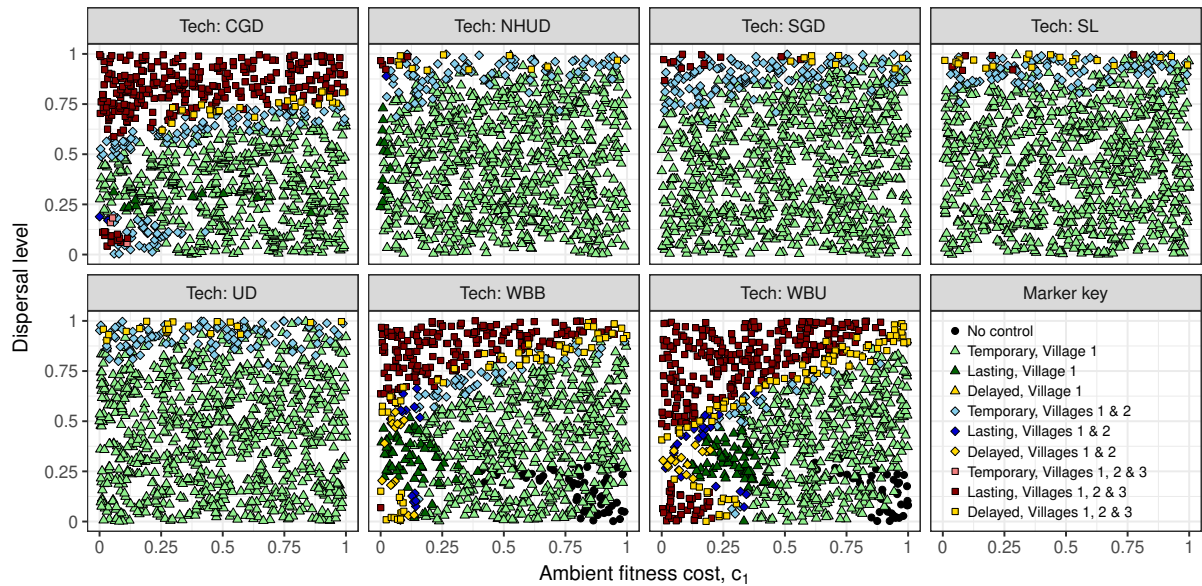

**Figure 1** The outcomes of a year-long control effort in one village, with two neighbouring villages, in which 2000 modified mosquitoes were released every week, for varying values of the ambient fitness cost,  $c_1$ , imposed by a single modified allele and the dispersal level, which for values in  $[0, 1]$  scales the average percentage of mosquitoes migrating from each node each day between 0% and 15%, and scales the probability distribution governing the distances that migrants travel. The lethality efficiency of the payload genes is  $c_2 = 0.85$ . The mosquito simulated here is an ‘average’ species, with life history parameters taken as the mean of those listed for *Aedes* and *Anopheles* in table 1. The control technologies are a self-limiting technology (SL), homologous underdominance (UD), non-homologous underdominance (NHUD), a homing gene drive with combined homing and lethal gene (CGD), a homing gene drive with separated homing and lethal genes (SGD), unidirectional single-strain *Wolbachia* (WBU) and bidirectional two-strain *Wolbachia* (WBB). The bottom right panel shows marker shape and colour codings. Temporary control means control in the year of releases but not after releases stop; lasting control means control that continues after releases stop; delayed control means control that does not take affect until the year after releases stop.

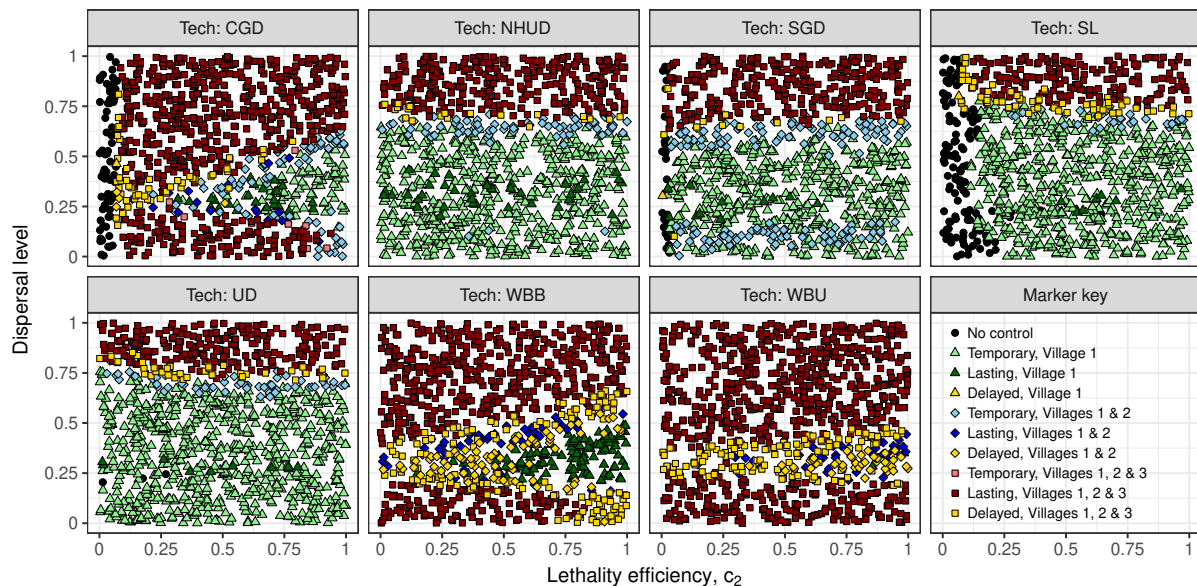

**Figure 2** The outcomes of a year-long control effort in one village, with two neighbouring villages, in which 2000 modified mosquitoes were released every week, for varying values of the lethality efficiency,  $c_2$ , of the payload genes and the dispersal level, which for values in  $[0, 1]$  scales the average percentage of mosquitoes migrating from each node each day between 0% and 15%, and scales the probability distribution governing the distances that migrants travel. The ambient fitness cost of a single transgene is  $c_1 = 0.05$ . The mosquito simulated here is an ‘average’ species, with life history parameters taken as the mean of those listed for *Aedes* and *Anopheles* in table 1. The control technologies are a self-limiting technology (SL), homologous underdominance (UD), non-homologous underdominance (NHUD), a homing gene drive with combined homing and lethal gene (CGD), a homing gene drive with separated homing and lethal genes (SGD), unidirectional single-strain *Wolbachia* (WBU) and bidirectional two-strain *Wolbachia* (WBB). The bottom right panel shows marker shape and colour codings. Temporary control means control in the year of releases but not after releases stop; lasting control means control that continues after releases stop; delayed control means control that does not take affect until the year after releases stop.

241 We find that varying the average migration distance and the percentage of a node’s population that  
 242 migrates strongly affects whether or not the genetic control can be spatially contained (fig. 1). for dispersal  
 243 levels lower than around 0.5 (7.5% moving each day, up to around 750m per lifetime), all technologies can  
 244 be expected to cause local suppression (or replacement) with eventual repopulation from neighbouring  
 245 villages. For invasive technologies like the CGD, WBU and WBB we see that for slowly dispersing  
 246 species, global suppression is possible (though perhaps delayed) for low ambient fitness costs as the  
 247 level of wild-type repopulation is too weak (fig. 1). This transition from global to local suppression at  
 248 lower dispersal levels is interesting as it occurs in the range of dispersal behaviours shown by *Aedes*  
 249 *aegypti* [32, 34], suggesting containment for this species may depend sensitively on the combination of  
 250 fitness costs imposed by the control technology. For highly dispersive species, it is possible that even  
 251 underdominance drives may cause global suppression (fig. 2). It is worth highlighting how the SGD, in  
 252 which the homing gene is inherited at the normal Mendelian rate, is far less invasive than the CGD.

253 To consider how variation in a species’ dispersal may affect whether and when a particular genetic  
 254 control technology could be effective, we examine in the following results two mosquito archetypes with  
 255 very different dispersal behaviours, which are broadly representative of the published dispersal ranges

256 for *Aedes aegypti* and *Anopheles gambiae* [29]. For the “*Ae. aegypti* archetype” we assume that most  
257 mosquitoes fly less than 65m over their lifetime and  $\sim 1\%$  fly over 400m [representative values from  
258 64, 66]. For the “*An. gambiae* archetype”, we assume that most mosquitoes fly less than 800m and  
259  $\sim 1\%$  fly over 1.25km [representative values from 32, 34] (see appendix S1a for the mathematical details  
260 and fig. 15 for an example of average spatial spread over a single 30-day lifetime). The percentage of  
261 a population dispersing from their current node each day is randomly sampled for every node each day  
262 from a Gaussian distribution centred at 7.5% for both species archetypes.

### 263 3.2 Mating success

264 The assumption of random mating is inappropriate if released males have a lower mating success than  
265 wild males. We capture this possibility by allowing wild females to mate proportionally more with wild  
266 males than with any modified genotype (see appendix S3a), with decreasing ability to be choosy as the  
267 wild male population diminishes. Mosquito mating behaviour is poorly understood and therefore our  
268 model makes no assumptions about the number of mates a female has, male re-mating rates, male or  
269 female reproductive skew or fertilization rate arising from each population. We model variation in mating  
270 success as a change in the relative ability of transgenic males to sire viable offspring with wild females  
271 compared to the ability of wild males.

272 We find that mating success has a large impact on the success of genetic control. For all technologies  
273 except *Wolbachia*, a mating success lower than 30% prevents even local control of *An. gambiae* (fig. 3).  
274 The *Wolbachia* systems WBU and WBB are able to cause population replacement at lower values of  
275 mating success due to the release of modified females, allowing the infection to stay in the population  
276 even with low wild-type mating (due to the *Wolbachia*-infected population mating amongst themselves).  
277 Of note is the containing effect that a mating success of lower than  $\sim 70\%$  has on the invasive CGD when  
278 the lethality efficiency is high; however, a moderate to low lethality efficiency of the payload gene acts to  
279 make the CGD invasive down to a mating success level of around 50% (fig. 4).

280 These results also provide further evidence that spatial containment of any control technology may  
281 be easier in *Ae. aegypti* than *An. gambiae*. The SL, UD and NHUD achieve temporary, local suppres-  
282 sion/replacement for a mating success above 40% in *Ae. aegypti* (figs. 5 and 6). For the CGD, global  
283 suppression of *Ae. aegypti* is achieved when the lethality efficiency is low and mating is almost random:  
284 for such a low lethality efficiency the gene drive is effectively acting as a weak bi-sex lethal technology,  
285 as the ambient fitness cost (which acts on males) is of the same order of magnitude (fig. 6). At very low  
286 mating success, the WBU is able to achieve population replacement while the the WBB is not. This is  
287 because of a population threshold effect: the releases under WBU are all of a single infection strain and  
288 the release sizes are enough to tip the balance in favour of the infection; in WBB the release size is split  
289 between two infection types, and the threshold effect does not trigger in favour of either infection strain.  
290 Widespread replacement across the three villages is achieved by both *Wolbachia* strategies in *Ae. aegypti*

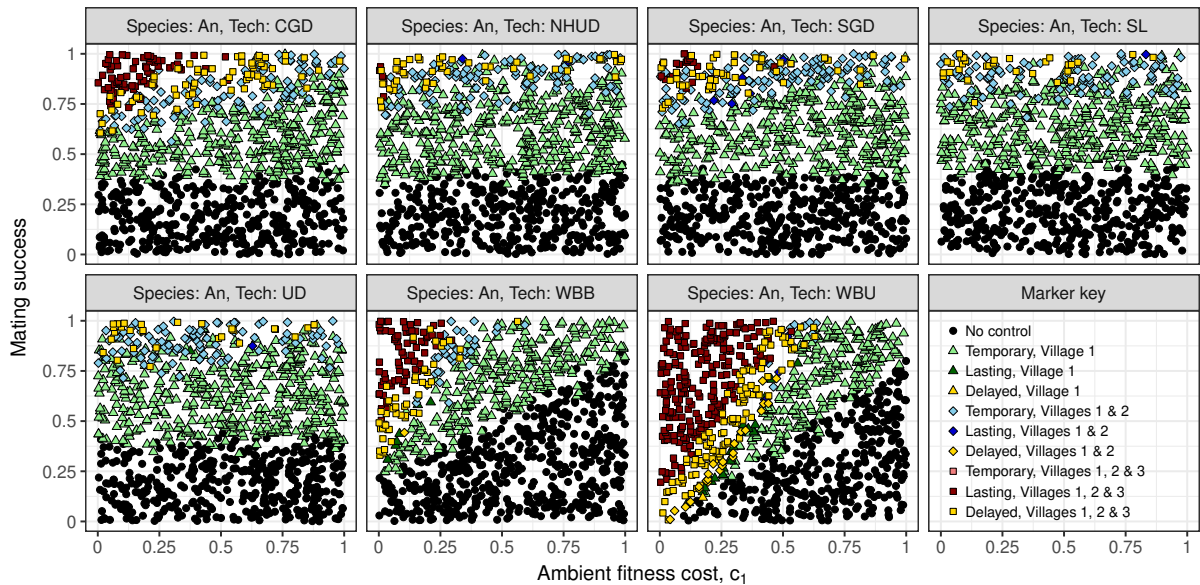

**Figure 3** Outcomes of a year-long control effort for *An. gambiae* when the mating success of modified males and the ambient fitness cost,  $c_1$ , imposed by each modified allele are varied. Mating success is defined in terms of the fraction of wild females who preferentially mate with wild-type males over males of a modified genotype: a mating success of one implies there is no mating preference; a mating success of zero implies all wild-type females choose to mate with wild-type males (see appendix S3a). Mating preference is scaled down when wild-type males are hard to find. The lethality efficiency of the payload genes is  $c_2 = 0.85$ . The control technologies are a self-limiting technology (SL), homologous underdominance (UD), non-homologous underdominance (NHUD), a homing gene drive with combined homing and lethal gene (CGD), a homing gene drive with separated homing and lethal genes (SGD), unidirectional single-strain *Wolbachia* (WBU) and bidirectional two-strain *Wolbachia* (WBB). The bottom right panel shows marker shape and colour codings. Temporary control means control in the year of releases but not after releases stop; lasting control means control that continues after releases stop; delayed control means control that does not take affect until the year after releases stop.



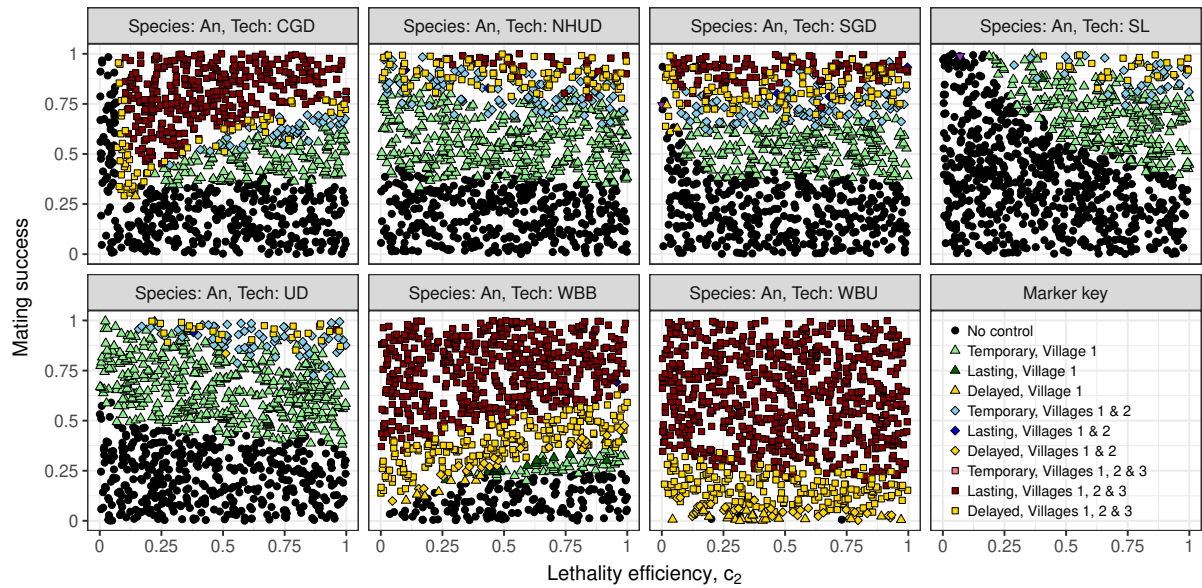

**Figure 4** Outcomes of a year-long control effort for *An. gambiae* when the mating success of modified males and the lethality efficiency,  $c_2$ , of the genetic control technologies are varied. Mating success is defined in terms of the fraction of wild females who preferentially mate with wild-type males over males of a modified genotype: a mating success of one implies there is no mating preference; a mating success of zero implies all wild-type females choose to mate with wild-type males (see appendix S3a). Mating preference is scaled down when wild-type males are hard to find. The ambient fitness cost of a single transgene is  $c_1 = 0.05$ . The control technologies are a self-limiting technology (SL), homologous underdominance (UD), non-homologous underdominance (NHUD), a homing gene drive with combined homing and lethal gene (CGD), a homing gene drive with separated homing and lethal genes (SGD), unidirectional single-strain *Wolbachia* (WBU) and bidirectional two-strain *Wolbachia* (WBB). The bottom right panel shows marker shape and colour codings. Temporary control means control in the year of releases but not after releases stop; lasting control means control that continues after releases stop; delayed control means control that does not take affect until the year after releases stop.

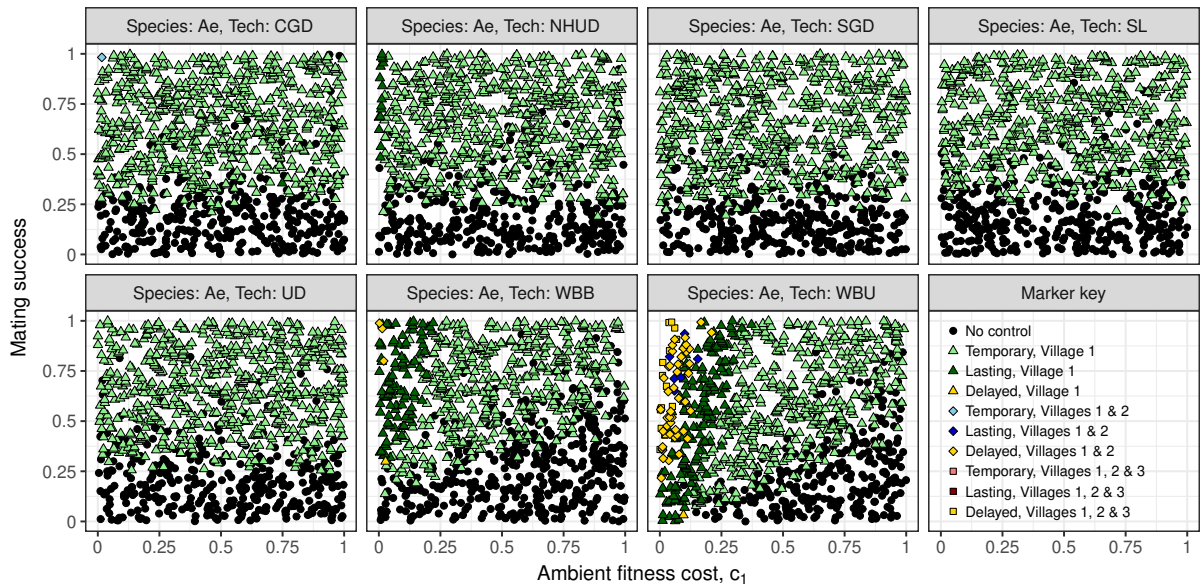

**Figure 5** Outcomes of a year-long control effort for *Ae. aegypti* mosquitoes when the mating success of modified males and the ambient fitness cost,  $c_1$ , imposed by each modified allele are varied. Mating success is defined in terms of the fraction of wild females who preferentially mate with wild-type males over males of a modified genotype: a mating success of one implies there is no mating preference; a mating success of zero implies all wild-type females choose to mate with wild-type males (see appendix S3a). Mating preference is scaled down when wild-type males are hard to find. The lethality efficiency of the payload genes is  $c_2 = 0.85$ . The control technologies are a self-limiting technology (SL), homologous underdominance (UD), non-homologous underdominance (NHUD), a homing gene drive with combined homing and lethal gene (CGD), a homing gene drive with separated homing and lethal genes (SGD), unidirectional single-strain *Wolbachia* (WBU) and bidirectional two-strain *Wolbachia* (WBB). The bottom right panel shows marker shape and colour codings. Temporary control means control in the year of releases but not after releases stop; lasting control means control that continues after releases stop; delayed control means control that does not take affect until the year after releases stop.

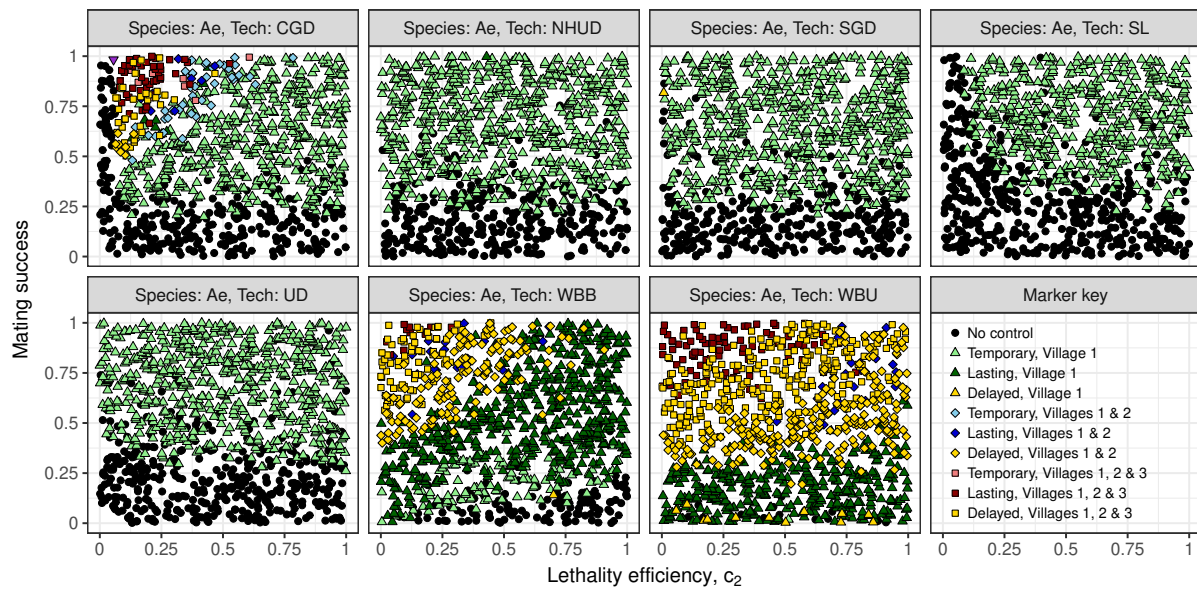

**Figure 6** Outcomes of a year-long control effort for *Ae. aegypti* when the mating success of modified males and the lethality efficiency,  $c_2$ , of the genetic control technologies are varied. Mating success is defined in terms of the fraction of wild females who preferentially mate with wild-type males over males of a modified genotype: a mating success of one implies there is no mating preference; a mating success of zero implies all wild-type females choose to mate with wild-type males (see appendix S3a). Mating preference is scaled down when wild-type males are hard to find. The ambient fitness cost of a single transgene is  $c_1 = 0.05$ . The control technologies are a self-limiting technology (SL), homologous underdominance (UD), non-homologous underdominance (NHUD), a homing gene drive with combined homing and lethal gene (CGD), a homing gene drive with separated homing and lethal genes (SGD), unidirectional single-strain *Wolbachia* (WBU) and bidirectional two-strain *Wolbachia* (WBB). The bottom right panel shows marker shape and colour codings. Temporary control means control in the year of releases but not after releases stop; lasting control means control that continues after releases stop; delayed control means control that does not take affect until the year after releases stop.

291 for near-random mating due to rare stochastic migration between villages (fig. 6).

### 292 3.3 *Anopheles* population size

293 Population genetic studies consistently show that the effective population size for *Anopheles* is  $\gtrsim 10000$  [5]  
 294 whereas for *Aedes* it is, on average, 400–600 [61]; their population census sizes are many tens of thousands  
 295 and just a few thousand, respectively [67, 72]. Here we investigate how this discrepancy in population  
 296 size affects the success of control efforts, by varying the base carrying capacity (prior to seasonality and  
 297 environmental stochasticity) of all nodes. A steep gradient of greater than one separating the red and  
 298 yellow suppression regions of the plots from the black regions means that an increase in release size has  
 299 a larger effect than a relative increase in the wild population (release growth dominates) – this is true for  
 300 WBU and CGD. A shallow gradient of less than one indicates that the growing population size swamps  
 301 the relative growth in the size of releases (wild type growth dominates), such as for SL and UD (fig. 7).

### 302 3.4 Resistance and invasion

303 That mosquitoes will develop resistance to genetic control technologies (as they have developed resistance  
 304 to insecticides and diminished the efficacy of bed nets) is widely agreed upon. The speed with which



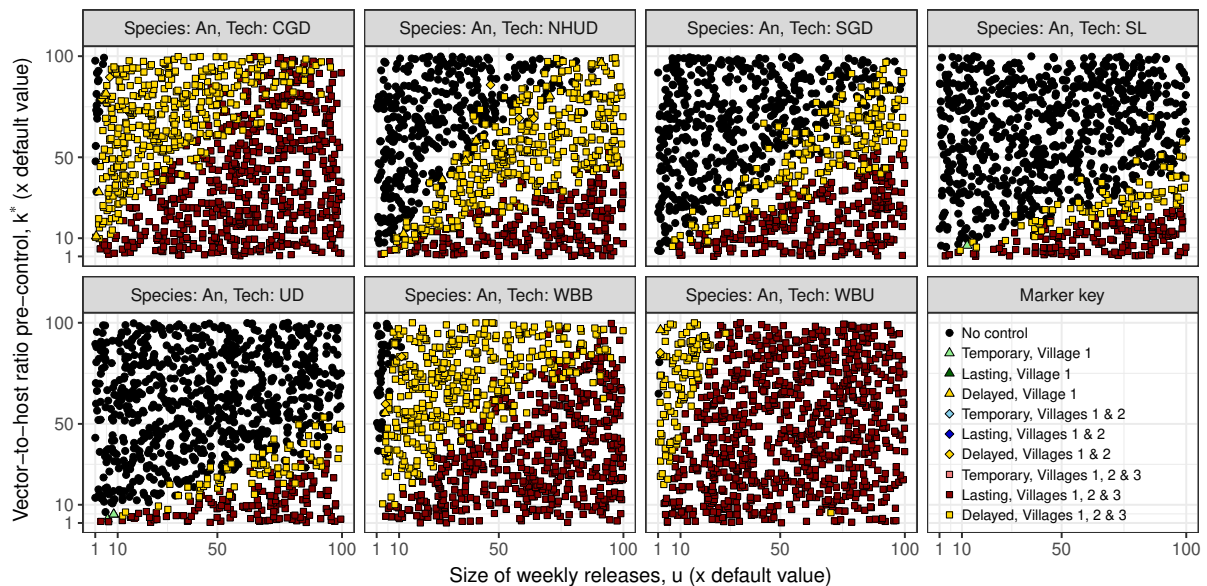

**Figure 7** The effect on control efforts of varying the carrying capacity of each node, as weekly release sizes are varied. Scales are relative to the default parameter values in table 1. The ambient fitness cost of a single transgene is  $c_1 = 0.05$  and the lethality efficiency of the payload gene is  $c_2 = 0.85$ . The mosquito species used is *An. gambiae*. The control technologies are a self-limiting technology (SL), homologous underdominance (UD), non-homologous underdominance (NHUD), a homing gene drive with combined homing and lethal gene (CGD), a homing gene drive with separated homing and lethal genes (SGD), unidirectional single-strain *Wolbachia* (WBU) and bidirectional two-strain *Wolbachia* (WBB). The bottom right panel shows marker shape and colour codings. Temporary control means control in the year of releases but not after releases stop; lasting control means control that continues after releases stop; delayed control means control that does not take affect until the year after releases stop.

305 this resistance will arise in the wild – either through the evolution of behavioural patterns that reduce  
 306 the spread of modified genes, or through the chance generation of homing-resistance alleles through non-  
 307 homologous end joining after DNA cutting [19, 68] – is unknown. Here we investigate how the speed with  
 308 which behavioural resistance emerges (through the development of mate preference over time) affects the  
 309 success of control efforts. We simulate over the parameter space spanned by the initial level of mating  
 310 preference and the period of time over which the mating preference becomes total (100% of wild females  
 311 choose to mate preferentially with wild males, unless lack of wild males forces them to mate with modified  
 312 males).

313 The immediate development of strong mating preference causes a problem for all technologies and  
 314 species (figs. 8 and 9). Only for very gradual emergence of behavioural resistance, in which it takes longer  
 315 than two years to reach zero mating success (when there are sufficient wild males to mate with instead),  
 316 can the CGD invade and suppress all three villages. Increasing release sizes is one way to combat this  
 317 behavioural resistance, although the effect is not linear: diminishing returns can be seen when releasing  
 318 larger numbers at low levels of mating success (figs. 10 and 11).

319 *Wolbachia* is unique among the current genetic control technologies (not least because it is not a  
 320 genetic control technology) due to the possibility of infection causing a fitness advantage in the modified  
 321 mosquitoes over the wild type. This may be due to the bacterium causing the mosquito to be less vulnera-  
 322 ble to viral infection [33, 65] and driving a higher larval survivorship in less competitive environments [27].

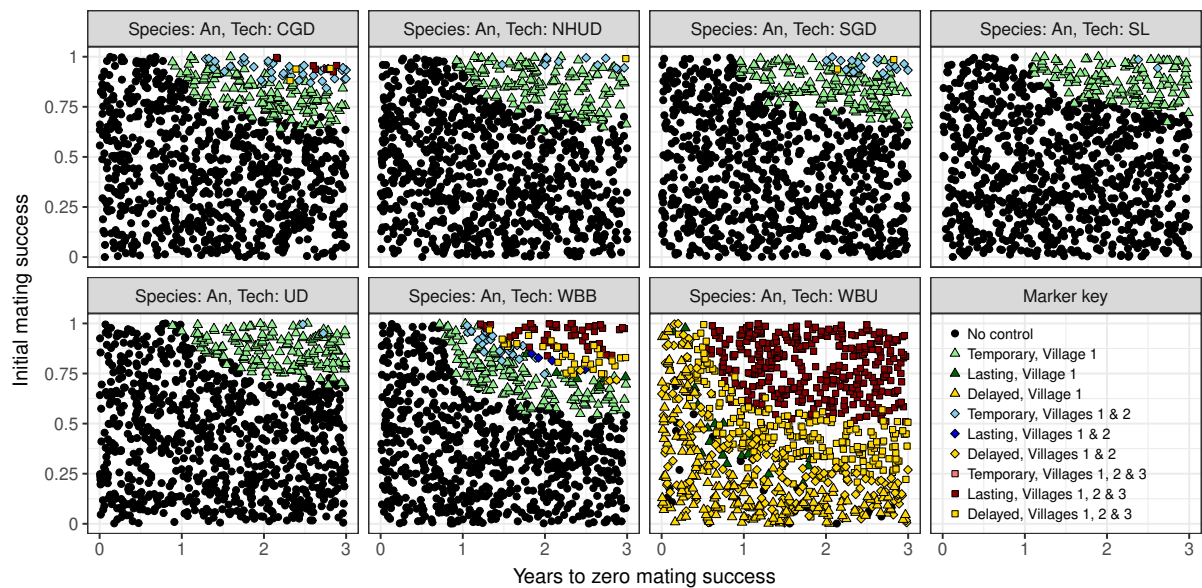

**Figure 8** Varying the initial modified male mating success and the speed with which the mating success linearly decreases to zero (at which point wild females display complete behavioural resistance to the technologies), expressed in terms of the time taken for the rate to reach zero. The ambient fitness cost of a single transgene is  $c_1 = 0.05$  and the lethality efficiency of the payload gene is  $c_2 = 0.85$ . The mosquito species used is *An. gambiae*. The control technologies are a self-limiting technology (SL), homologous underdominance (UD), non-homologous underdominance (NHUD), a homing gene drive with combined homing and lethal gene (CGD), a homing gene drive with separated homing and lethal genes (SGD), unidirectional single-strain *Wolbachia* (WBU) and bidirectional two-strain *Wolbachia* (WBB). The bottom right panel shows marker shape and colour codings. Temporary control means control in the year of releases but not after releases stop; lasting control means control that continues after releases stop; delayed control means control that does not take affect until the year after releases stop.

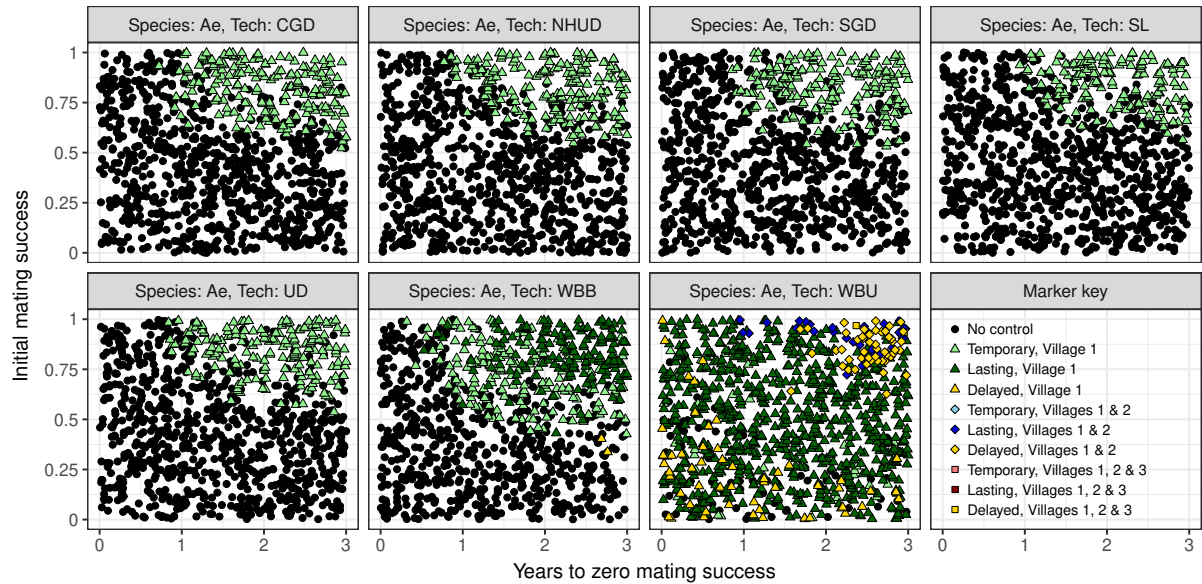

**Figure 9** Varying the initial modified male mating success and the speed with which the mating success linearly decreases to zero (at which point wild females display complete behavioural resistance to the technologies), expressed in terms of the time taken for the rate to reach zero. The ambient fitness cost of a single transgene is  $c_1 = 0.05$  and the lethality efficiency of the payload gene is  $c_2 = 0.85$ . The mosquito species used is *Ae. aegypti*. The control technologies are a self-limiting technology (SL), homologous underdominance (UD), non-homologous underdominance (NHUD), a homing gene drive with combined homing and lethal gene (CGD), a homing gene drive with separated homing and lethal genes (SGD), unidirectional single-strain *Wolbachia* (WBU) and bidirectional two-strain *Wolbachia* (WBB). The bottom right panel shows marker shape and colour codings. Temporary control means control in the year of releases but not after releases stop; lasting control means control that continues after releases stop; delayed control means control that does not take affect until the year after releases stop.

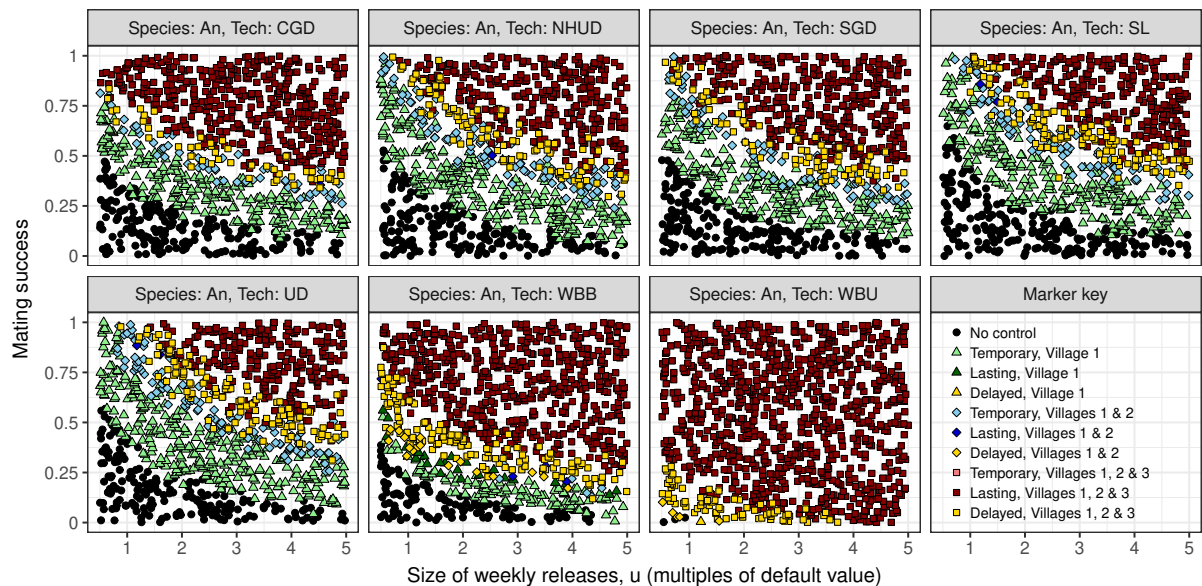

**Figure 10** The effect of increasing release sizes, relative to the default value in table 1, to combat mating preference, for *An. gambiae*. The ambient fitness cost of a single transgene is  $c_1 = 0.05$  and the lethality efficiency of the payload gene is  $c_2 = 0.85$ . The control technologies are a self-limiting technology (SL), homologous underdominance (UD), non-homologous underdominance (NHUD), a homing gene drive with combined homing and lethal gene (CGD), a homing gene drive with separated homing and lethal genes (SGD), unidirectional single-strain *Wolbachia* (WBU) and bidirectional two-strain *Wolbachia* (WBB). The bottom right panel shows marker shape and colour codings. Temporary control means control in the year of releases but not after releases stop; lasting control means control that continues after releases stop; delayed control means control that does not take affect until the year after releases stop.



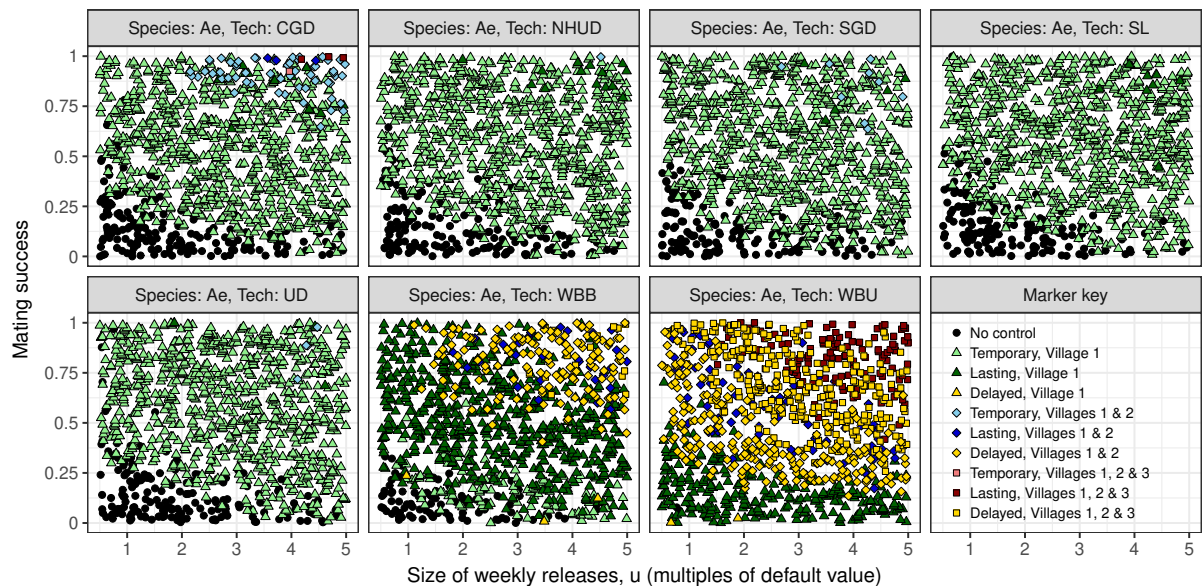

**Figure 11** The effect of increasing release sizes, relative to the default value in table 1, to combat mating preference, for *Ae. aegypti*. The ambient fitness cost of a single transgene is  $c_1 = 0.05$  and the lethality efficiency of the payload gene is  $c_2 = 0.85$ . The control technologies are a self-limiting technology (SL), homologous underdominance (UD), non-homologous underdominance (NHUD), a homing gene drive with combined homing and lethal gene (CGD), a homing gene drive with separated homing and lethal genes (SGD), unidirectional single-strain *Wolbachia* (WBU) and bidirectional two-strain *Wolbachia* (WBB). The bottom right panel shows marker shape and colour codings. Temporary control means control in the year of releases but not after releases stop; lasting control means control that continues after releases stop; delayed control means control that does not take affect until the year after releases stop.

323 Here we study how the fitness differential between wild type and *Wolbachia*-infected mosquitoes affects  
 324 the ability of the bacteria to invade neighbouring populations.

325 If there is close to zero infection leakage (the fraction of offspring that are wild type when they  
 326 would normally have been infected if infection was completely efficient), even a small fitness advantage  
 327 (shown as a negative fitness cost) for the *Wolbachia*-infected mosquitoes is very likely to lead to complete  
 328 population replacement in the three villages (fig. 12). For *Ae. aegypti* mosquitoes, neutral or slightly  
 329 costly *Wolbachia* strains coupled with a small amount of infection leakage is likely to lead to contained,  
 330 and possibly temporary, population replacement. In all cases the unidirectional system is more invasive,  
 331 even at relatively high fitness costs in the *An. gambiae* case. Inefficiencies in *Wolbachia* infection could  
 332 prevent population replacement from taking place, even for very advantageous strains. If one is not able  
 333 to alter the infection efficiency of *Wolbachia* strains, invasiveness could be managed by reducing release  
 334 sizes. Containment can be achieved in the *Anopheles* case by halving the weekly release size to 1000 if  
 335 the strains impose a moderate ambient fitness cost (fig. 13). However, even for the *Aedes* mosquitoes,  
 336 *Wolbachia* strains with a moderate fitness advantage can invade neighbouring populations when releases  
 337 are small.

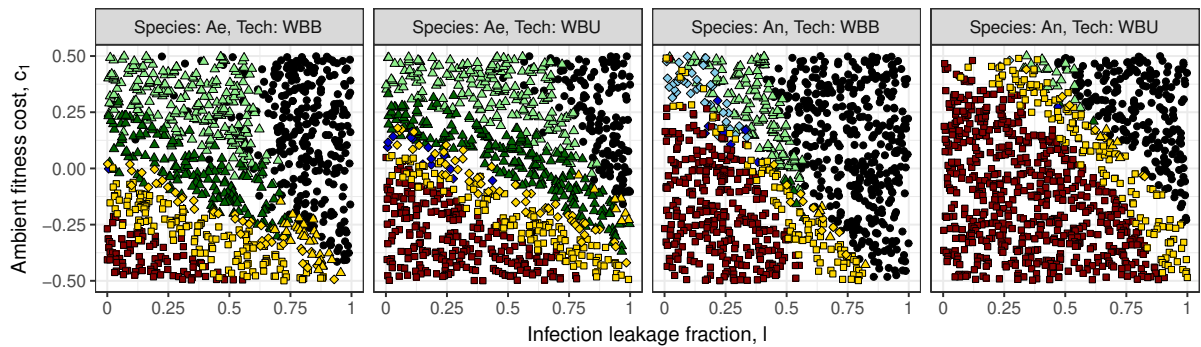

**Figure 12** The effect of ambient fitness cost ( $c_1 > 0$ ) or advantage ( $c_1 < 0$ ) on the ability of two *Wolbachia* systems, unidirectional (WBU) and bidirectional (WBB), to invade neighbouring *Ae. aegypti* (Ae) and *An. gambiae* (An) populations, as the infection leakage of the *Wolbachia* strains is varied. We define infection leakage as the percentage of offspring that remain uninfected when they would usually be infected with *Wolbachia* (and can be thought of as the opposite of a homing rate). Marker colour and shape coding as in all other figures.

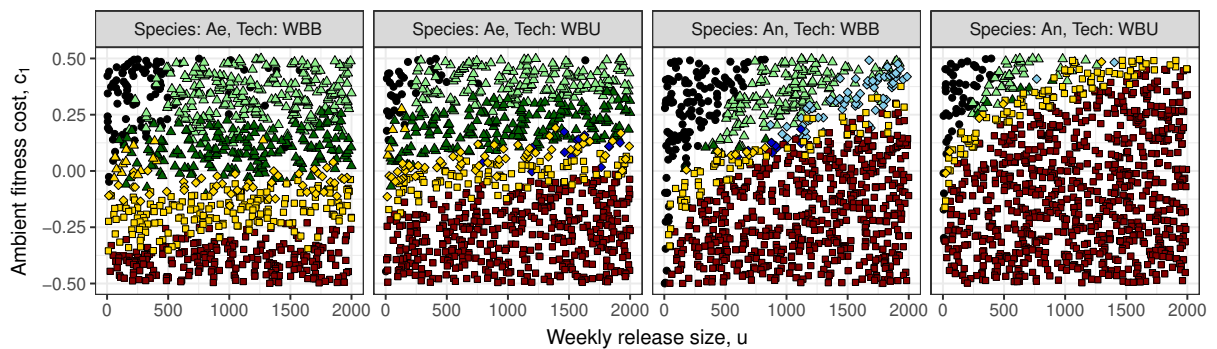

**Figure 13** The effect of ambient fitness cost ( $c_1 > 0$ ) or advantage ( $c_1 < 0$ ) on the ability of two *Wolbachia* systems, unidirectional (WBU) and bidirectional (WBB), to invade neighbouring *Ae. aegypti* (Ae) and *An. gambiae* (An) populations, as the size of weekly releases of *Wolbachia*-infected males and females is varied. Releases are spread equally between both sexes in the unidirectional system and between both sexes and both strains in the bidirectional system. Marker colour and shape coding as in all other figures.

## 338 4 Discussion

339 We compared the ability of seven vector control technologies to suppress *Aedes aegypti* or *Anopheles*  
340 *gambiae* mosquito populations across three villages (or neighbourhoods), and examined the impact of  
341 mosquito dispersal behaviour and emergent behavioural resistance on the efficacy of genetic control.

342 We find that in mosquitoes with dispersal behaviour akin to *An. gambiae* (with an average lifetime  
343 dispersal in the range of several hundred metres to one kilometre), that it will be very difficult to contain  
344 a homing gene drive (in which the homing and lethal gene are combined) and *Wolbachia* systems if  
345 mating between modified and wild mosquitoes occurs successfully. This is a robust result: over a large  
346 range of population sizes and gene drive fitness costs, *Wolbachia* and a combined homing gene drive  
347 are ‘uncontained’ and will spread and cause lasting suppression across a large geographic area (fig. 1).  
348 Homing gene drives in which the drive gene and payload gene are separated (with the drive gene inherited  
349 at a Mendelian rate) are less invasive than combined gene drive systems. Spatial containment is likely  
350 with underdominance threshold drives and self-limiting technology although not guaranteed for highly  
351 dispersive species (fig. 2).

352 In contrast, we show that for mosquitoes with dispersal behaviour akin to *Ae. aegypti* (with an  
353 average lifetime dispersal of less than 100m), the invasiveness of a homing technology (and the invasive  
354 *Wolbachia* systems) is more dependent on the genetic fitness costs it imposes, and a complex balance  
355 between local suppression/replacement and repopulation from neighbouring wild-type populations exists  
356 (fig. 1). Note, we do not take human movement into account—possibly, a person could unintentionally  
357 introduce genetically modified mosquitoes into a distant control-naïve population. For *Ae. aegypti*, our  
358 results suggest that to achieve population suppression over a large geographic area will require multiple  
359 release locations and careful planning. This is in direct agreement with the findings of Legros et al.  
360 [47], in which large-area control of *Ae. aegypti* via female-killing transgenes (similar to the self-limiting  
361 technology studied here) was found to be an unrealistic goal unless spatially homogeneous releases could  
362 be performed. While this release protocol for *Ae. aegypti* may be more costly, the pay-off is that  
363 population suppression is likely to be sustained after releases stop due to the low level of immigration  
364 from uncontrolled areas—although long-term re-population is unavoidable [47]. In summary, these results  
365 suggests that there might be scope for safe deployment of so-called ‘global’ gene drives in one species,  
366 but not another. Put simply, a ‘one size fits all’ approach to genetic control will not work.

367 Together, our results demonstrate that the efficacy and safety of genetic control is extremely sensitive  
368 to biological and ecological details. For example, the stark differences in the impact of genetic control on  
369 *An. gambiae* and *Ae. aegypti* arise from how we assume these two species disperse and their different de-  
370 mographic parameters. At present, our understanding of mosquito dispersal is incomplete: within-species  
371 estimates of dispersal vary widely, the frequency of long-range dispersal in *An. gambiae* is unclear [15] and  
372 the impact of man-made obstacles and natural topography on movement is poorly understood. What is  
373 certain is that there is a significant difference in the dispersal behaviour of these species. Genetic studies

374 show that the effective population size for *Ae. aegypti* populations is 300–600 and the census size is a  
375 few thousand [72], whereas in *An. gambiae* the effective population size is estimated to be  $\gtrsim 10,000$  [5]  
376 and the census size is many tens of thousands [67]. Consequently, the speed and extent of gene flow  
377 through an *Ae. aegypti* population is vastly different to that in *An. gambiae*, and this may mean that  
378 different genetic control approaches and different spatial release strategies will be required. Our finding  
379 that mating success has a major impact on the efficacy of genetic control is particularly significant given  
380 that so little is known about mosquito mating behaviour. For example, we still do not know the degree  
381 to which females are able to choose their mates.

382 Our goal in this work was to demonstrate how the performance of different types of genetic control  
383 will be determined by the target species' biology and ecology. In our mathematical approach we chose to  
384 make simplifying assumptions and generalizations about the life cycle and behaviour of mosquitoes. This  
385 is common in the literature, and we do it here in order to examine specific questions within a simplified  
386 framework that does not rely on the detailed, difficult and error-prone parameterisations of more complex  
387 agent-based models [46, 48, 56, 59]. Of course, it is vital that we understand the limitations of simplified  
388 models and that making common simplifying assumptions – while useful – should never obscure the  
389 importance of gaining a richer empirical understanding. First, we assume a simple life-cycle model  
390 with constant maturation rate and adult death rate; however, survivorship and maturation rate will be  
391 dependent on local conditions such as resource availability and temperature—which may affect wild and  
392 transgenic mosquitoes differently. A richer life-cycle model may be able to capture the phenotypic effect  
393 of genetic control more accurately, e.g. whether it reduces adult life spans, prevents successful oviposition  
394 or increases larval death rates, and hence could elucidate how changes in the local ecology affect their  
395 action. We captured seasonal changes in population size by varying the carrying capacity of each node;  
396 however seasonality could impact the life-cycle in many ways: changing temperature and the resulting  
397 effects on maturation; the number and quality of breeding sites available [as impressively modelled in  
398 current agent-based approaches 48, 56]; the intensity of predation; and the availability of sugar. In our  
399 model we assume that the host population remains constant in time and equal across all spatial sites.  
400 However, seasonal human migration into and out of disease hotspots is common – due to, for instance,  
401 pastoralism – and the interaction between human movement and mosquito seasonal dynamics may pose  
402 a unique challenge for disease control programmes [57, 58].

403 Second, we assume random, continuous mating and capture variation in mating success between wild  
404 types and transgenics simply as a shift in offspring proportions. This variation in mating success could  
405 arise from differences in re-mating behaviour, disparity in fertilization rates, numbers of viable progeny  
406 or female mate choice. A theoretical and empirical understanding of these biological details is needed.  
407 For example, if variation in mating success is mainly due to numbers of viable progeny, the impact on  
408 genetic control strategies may be limited to adjusting release rates. However, if female mate choice is  
409 driving the variation in mating success, this may have important consequences for long-term genetic  
410 control. If wild females can avoid or reject transgenic males then natural selection on female choice could



411 cause genetic control to fail due to ‘behavioural resistance’ (which would manifest in the current model  
412 as a significant decrease in the mating success of released mosquitoes). Females have been shown to  
413 exhibit clear rejection behaviours towards males. In species such as *Ae. aegypti*, where males do not  
414 provide material resources such as food or territory, females are predicted to assess and choose mates  
415 based on heritable traits associated with improved offspring fitness [11, 42]. Our results suggest that  
416 even small reductions in the mating success of genetically modified males with wild females – due to a  
417 rapid appearance of behavioural resistance, for example – may prevent the spread of homing gene drives,  
418 creating a spatial containment effect (figs. 3–4 and 6). If this behavioural resistance emerges very quickly  
419 (within a year or two of the start of releases), it could damage the efficacy of control efforts to a large  
420 degree (figs. 8 and 9), and this damage can only partially be prevented by increasing release sizes (figs. 10  
421 and 11).

422 Third, we assume unintended fitness costs are constant in time. However, at least for some control  
423 technologies we would expect that these costs would increase over time. For example, this may occur  
424 in the case of a CRISPR/Cas9 homing gene drive, where unintended DNA mutations (off-target effects)  
425 build up over time and may lead to an increasing unintended fitness cost on gene drive-bearing insects.  
426 If these ambient fitness costs can be predicted on a generation-by-generation basis (or at a more granular  
427 resolution), computational models like that presented here could be used to inform how control strategies  
428 might be altered to account for the changing fitness burden.

429 Overall, these results show that a clearer understanding of the biology and ecology of target mosquito  
430 species will be vital for the successful implementation of genetic control for population suppression.  
431 The “success” of an implementation is measured here in terms of the scale, spatial extent and perma-  
432 nence/transience of vector population suppression (or replacement). In the field, these metrics of success  
433 could be assessed through mark-release-recapture operations, and the short-term efficacy of a control pro-  
434 gramme could be monitored. Over the longer term, governments and national and international health  
435 agencies will measure success through reductions in disease levels; easing of the burden on local health  
436 services; the lowering of the number of work/school days lost to illness; and the value for money that  
437 the control programme represents to achieve these improvements. Weighing costs and benefits of disease  
438 control schemes is vitally important [3]; finding optimal implementation strategies could minimise the  
439 economic burden while maintaining effective disease reduction [41]. However, variability in vector be-  
440 haviour, environmental stochasticity and the possibility of disease reintroduction via human or mosquito  
441 migration mean there cannot be a single catch-all strategy for cost-effective vector control. Our results  
442 suggest that some forms of genetic control may be safe and effective in one species but not in another.  
443 Even within a species, the most suitable genetic control strategy will depend upon the local environment  
444 and ecology. This presents a challenge for regulators; any given genetic control approach may be effective  
445 and/or safely contained in one setting, but not in another, suggesting that a flexible application-specific  
446 regulatory approach is needed.

447 Risk assessment of GM mosquitoes is guided by national and international legislative instruments,

448 implementation frameworks and guidance policies [14, 23, 37, 71]. Current assessment guidance, associ-  
449 ated with only risks of GM mosquito releases, follows three main principles: (i) efficacy of the technology,  
450 (ii) biosafety associated with adverse effects of releases on human health and/or wider biodiversity and  
451 (iii) cultural acceptance of novel technologies [69]. Current assessment of GM mosquitoes by national  
452 and international public health agencies is under way [e.g., 70] and our work is entirely pertinent to these  
453 assessments as the spatio-temporal dynamics of different mosquitoes will feed into efficacy assessments  
454 (identifying key parameters that affect the outcome of mosquito control) and biosafety (understanding  
455 the implication of the wider impacts of GM mosquito releases on the public health burden of disease  
456 and the ecological effects of control on wider biodiversity). Given all this, we argue that there is now  
457 compelling scope to consider public health benefits together with the risks of modified mosquito releases  
458 within inclusive, proportionate legislative and guidance frameworks.

459 Optimistically, our comparative approach for assessing different mosquito control interventions pro-  
460 vides a tool to adopt and develop for assessing risks and biosafety of different genetics-based approaches  
461 for integrated vector control and management (particularly in cases where the specific and detailed data  
462 required for parameterisation of more complex agent-based models are unavailable, which is commonly  
463 the case). To date, most theoretical studies have focused on finding the specifications of the biotechnology  
464 that produce the desired effects in simplified population genetics models or through complex individual-  
465 based models. By comparing across technologies and species, our results show that these specifications  
466 are not as important as the understudied, poorly understood ecological, evolutionary and environmental  
467 factors in determining whether genetic control will fail or succeed.

## 468 **Acknowledgments**

469 We thank Detlef Bartsch, Laura Harrington and the Mathematical Ecology Research Group in Oxford  
470 for discussion and comments on this work. The work was supported by funding from DARPA (HR0011-  
471 16-2-0006)

## 472 **Conflict of interest**

473 The authors declare that they have no conflict of interest.

## 474 References

- 475 [1] Alphey, L. (2002). Re-engineering the sterile insect technique. *Insect Biochemistry and Molecular*  
476 *Biology*, 32(10):1243–1247.
- 477 [2] Alphey, L. (2014). Genetic control of mosquitoes. *Annual Review of Entomology*, 59:205–224.
- 478 [3] Alphey, N., Alphey, L., and Bonsall, M. B. (2011). A model framework to estimate impact and cost  
479 of genetics-based sterile insect methods for dengue vector control. *PLOS ONE*, 6(10):1–12.
- 480 [4] Alphey, N. and Bonsall, M. B. (2014). Interplay of population genetics and dynamics in the genetic  
481 control of mosquitoes. *Journal of The Royal Society Interface*, 11(93).
- 482 [5] Athrey, G., Hodges, T. K., Reddy, M. R., Overgaard, H. J., Matias, A., Ridl, F. C., Kleinschmidt, I.,  
483 Caccone, A., and Slotman, M. A. (2012). The effective population size of malaria mosquitoes: Large  
484 impact of vector control. *PLOS Genetics*, 8(12):1–14.
- 485 [6] Barreaux, A. M. G., Stone, C. M., Barreaux, P., and Koella, J. C. (2018). The relationship between  
486 size and longevity of the malaria vector *Anopheles gambiae* (s.s.) depends on the larval environment.  
487 *Parasites & Vectors*, 11(1):485.
- 488 [7] Bull, J. J. (2015). Evolutionary decay and the prospects for long-term disease intervention using  
489 engineered insect vectors. *Evolution, Medicine, and Public Health*, 2015(1):152–166.
- 490 [8] Burt, A. (2003). Site-specific selfish genes as tools for the control and genetic engineering of natural  
491 populations. *Proceedings of the Royal Society B: Biological Sciences*, 270(1518):921–928.
- 492 [9] Bushland, R. C. (1974). Letter: Screwworm eradication program. *Science*, 184(4140):1010–1011.
- 493 [10] Carvalho, D. O., McKemey, A. R., Garziera, L., Lacroix, R., Donnelly, C. A., Alphey, L., Malavasi,  
494 A., and Capurro, M. L. (2015). Suppression of a field population of *Aedes aegypti* in Brazil by sustained  
495 release of transgenic male mosquitoes. *PLOS Neglected Tropical Diseases*, 9(7):1–15.
- 496 [11] Cator, L. J. and Harrington, L. C. (2011). The Harmonic Convergence of Fathers Predicts the  
497 Mating Success of Sons in *Aedes aegypti*. *Animal Behaviour*, 82(4):627–633.
- 498 [12] Cho, S. W., Kim, S., Kim, Y., Kweon, J., Kim, H. S., Bae, S., and Kim, J. S. (2014). Analysis of  
499 off-target effects of CRISPR/Cas-derived RNA-guided endonucleases and nickases. *Genome Research*,  
500 24(1):132–141.
- 501 [13] Clements, A. N. and Paterson, G. D. (1981). The analysis of mortality and survival rates in wild  
502 populations of mosquitoes. *Journal of Applied Ecology*, 18(2):373–399.
- 503 [14] Council of European Union (2001). Council Directive 2001/18/EC on the deliberate release into the  
504 environment of genetically modified organisms. OJ L 106/0001 - 0039.

- 505 [15] Dao, A., Yaro, A. S., Diallo, M., Timbine, S., Huestis, D. L., Kassogue, Y., Traore, A. I., Sanogo,  
506 Z. L., Samake, D., and Lehmann, T. (2014). Signatures of aestivation and migration in Sahelian malaria  
507 mosquito populations. *Nature*, 516(7531):387–390.
- 508 [16] Davis, S., Bax, N., and Grewe, P. (2001). Engineered underdominance allows efficient and economical  
509 introgression of traits into pest populations. *Journal of Theoretical Biology*, 212(1):83–98.
- 510 [17] Davis, W. A., Clarke, P. M., Siba, P. M., Karunajeewa, H. A., Davy, C., Mueller, I., and Davis,  
511 T. M. E. (2011). Cost-effectiveness of artemisinin combination therapy for uncomplicated malaria in  
512 children: data from papua new guinea. *Bulletin of the World Health Organization*, 89(3):211–220.
- 513 [18] Deredec, A., Godfray, H. C. J., and Burt, A. (2011). Requirements for effective malaria control with  
514 homing endonuclease genes. *Proceedings of the National Academy of Sciences*, 108(43):E874–E880.
- 515 [19] Drury, D. W., Dapper, A. L., Siniard, D. J., Zentner, G. E., and Wade, M. J. (2017). CRISPR/Cas9  
516 gene drives in genetically variable and nonrandomly mating wild populations. *Science Advances*,  
517 3(5):e1601910.
- 518 [20] Dye, C. (1984). Models for the population dynamics of the yellow fever mosquito, *aedes aegypti*.  
519 *Journal of Animal Ecology*, 53(1):247–268.
- 520 [21] E., M. L. and H., K. B. (1998). *Aedes aegypti* survival and dispersal estimated by mark-release-  
521 recapture in northern australia. *The American Journal of Tropical Medicine and Hygiene*, 58(3):277–  
522 282.
- 523 [22] Eckhoff, P. A., Wenger, E. A., Godfray, H. C. J., and Burt, A. (2017). Impact of mosquito gene  
524 drive on malaria elimination in a computational model with explicit spatial and temporal dynamics.  
525 *Proceedings of the National Academy of Sciences*, 114(2):E255–E264.
- 526 [23] EFSA (2013). Guidance on the environmental risk assessment of genetically modified animals. *EFSA*  
527 *Journal*, 11(5):3200–3390.
- 528 [24] Ermert, V., Fink, A. H., Jones, A. E., and Morse, A. P. (2011a). Development of a new version of  
529 the liverpool malaria model. i. refining the parameter settings and mathematical formulation of basic  
530 processes based on a literature review. *Malaria Journal*, 10(1):35.
- 531 [25] Ermert, V., Fink, A. H., Jones, A. E., and Morse, A. P. (2011b). Development of a new version of  
532 the Liverpool Malaria Model. II. Calibration and validation for West Africa. *Malaria Journal*, 10(1):62.
- 533 [26] Esvelt, K. M., Smidler, A. L., Catteruccia, F., and Church, G. M. (2014). Emerging technology:  
534 Concerning rna-guided gene drives for the alteration of wild populations. *eLife*, 3:e03401.
- 535 [27] Gavotte, L., Mercer, D. R., Stoeckle, J. J., and Dobson, S. L. (2010). Costs and benefits of Wolbachia  
536 infection in immature *Aedes albopictus* depend upon sex and competition level. *Journal of Invertebrate*  
537 *Pathology*, 105(3):341–346.

- 538 [28] Gorman, K., Young, J., Pineda, L., Márquez, R., Sosa, N., Bernal, D., Torres, R., Soto, Y., Lacroix,  
539 R., Naish, N., Kaiser, P., Tepedino, K., Philips, G., Kosmann, C., and Cáceres, L. (2016). Short-  
540 term suppression of *aedes aegypti* using genetic control does not facilitate *aedes albopictus*. *Pest*  
541 *Management Science*, 72(3):618–628.
- 542 [29] Guerra, C. A., Reiner, R. C., Perkins, T. A., Lindsay, S. W., Midega, J. T., Brady, O. J., Barker,  
543 C. M., Reisen, W. K., Harrington, L. C., Takken, W., Kitron, U., Lloyd, A. L., Hay, S. I., Scott, T. W.,  
544 and Smith, D. L. (2014). A global assembly of adult female mosquito mark-release-recapture data to  
545 inform the control of mosquito-borne pathogens. *Parasites & Vectors*, 7(1):276.
- 546 [30] Hancock, P. A., White, V. L., Callahan, A. G., Godfray, C. H. J., Hoffmann, A. A., and Ritchie, S. A.  
547 (2016a). Density-dependent population dynamics in *aedes aegypti* slow the spread of *wmel wolbachia*.  
548 *Journal of Applied Ecology*, 53(3):785–793.
- 549 [31] Hancock, P. A., White, V. L., Ritchie, S. A., Hoffmann, A. A., and Godfray, H. C. J. (2016b).  
550 Predicting *wolbachia* invasion dynamics in *aedes aegypti* populations using models of density-dependent  
551 demographic traits. *BMC Biology*, 14(1):96.
- 552 [32] Harrington, L. C., Scott, T. W., Lerdthusnee, K., Coleman, R. C., Costero, A., Clark, G. G., Jones,  
553 J. J., Kitthawee, S., Kittayapong, P., Sithiprasasna, R., and Edman, J. D. (2005). Dispersal of the  
554 dengue vector *Aedes aegypti* within and between rural communities. *The American Journal of Tropical*  
555 *Medicine and Hygiene*, 72(2):209–220.
- 556 [33] Hedges, L. M., Brownlie, J. C., O’Neill, S. L., and Johnson, K. N. (2008). *Wolbachia* and virus  
557 protection in insects. *Science*, 322(5902):702.
- 558 [34] Hemme, R. R., Thomas, C. L., Chadee, D. D., and Severson, D. W. (2010). Influence of urban  
559 landscapes on population dynamics in a short-distance migrant mosquito: evidence for the dengue  
560 vector *Aedes aegypti*. *PLOS Neglected Tropical Diseases*, 4(3):e634.
- 561 [35] Hibino, Y. and Iwahashi, O. (1991). Appearance of wild females unreceptive to sterilized males on  
562 Okinawa Is. in the eradication program of the melon fly, *dacus cucurbitae* COQUILLET (Diptera:  
563 Tephritidae). *Applied Entomology and Zoology*, 26(2):265–270.
- 564 [36] Hoshen, M. B. and Morse, A. P. (2004). A weather-driven model of malaria transmission. *Malaria*  
565 *Journal*, 3(1):32.
- 566 [37] House of Lords Science & Technology Select Committee (2015). Genetically modified insects. Pub-  
567 lished by the Authority of the House of Lords, HL Paper 68, pp56.
- 568 [38] Huang, Y., Lloyd, A. L., Legros, M., and Gould, F. (2011). Gene-drive into insect populations with  
569 age and spatial structure: a theoretical assessment. *Evolutionary Applications*, 4(3):415–428.

- 570 [39] Jannat, K. N.-E. and Roitberg, B. D. (2013). Effects of larval density and feeding rates on larval life  
571 history traits in *Anopheles gambiae* s.s. (diptera: Culicidae). *Journal of Vector Ecology*, 38(1):120–126.
- 572 [40] Khamis, D., El Mouden, C., Kura, K., and Bonsall, M. B. (2018a). Ecological effects on underdom-  
573 inance threshold drives for vector control. *Journal of Theoretical Biology*, 456:1–15.
- 574 [41] Khamis, D., El Mouden, C., Kura, K., and Bonsall, M. B. (2018b). Optimal control of malaria:  
575 combining vector interventions and drug therapies. *Malaria Journal*, 17(1):174.
- 576 [42] Kokko, H., Brooks, R., Jennions, M. D., and Morley, J. (2003). The evolution of mate choice and  
577 mating biases. *Proceedings of the Royal Society B: Biological Sciences*, 270(1515):653–664.
- 578 [43] Kweka, E. J., Tenu, F., Magogo, F., and Mboera, L. E. G. (2015). *Anopheles gambiae* sensu stricto  
579 Aquatic Stages Development Comparison between Insectary and Semifield Structure. *Advances in*  
580 *Zoology*, 2015(720365):6.
- 581 [44] Lana, R. M., Carneiro, T. G. S., Honório, N. A., and Codeço, C. T. (2014). Seasonal and nonseasonal  
582 dynamics of *aedes aegypti* in rio de janeiro, brazil: Fitting mathematical models to trap data. *Acta*  
583 *Tropica*, 129:25–32. Human Infectious Diseases and Environmental Changes.
- 584 [45] Lee, H. L. and Joko, H. (2009). Comparative life parameters of transgenic and wild strain of *Aedes*  
585 *aegypti* in the laboratory. WHO Regional Office for South-East Asia.
- 586 [46] Legros, M., Xu, C., Morrison, A., Scott, T. W., Lloyd, A. L., and Gould, F. (2013). Modeling the  
587 dynamics of a non-limited and a self-limited gene drive system in structured *aedes aegypti* populations.  
588 *PLOS ONE*, 8(12).
- 589 [47] Legros, M., Xu, C., Okamoto, K., Scott, T. W., Morrison, A. C., Lloyd, A. L., and Gould, F.  
590 (2012). Assessing the feasibility of controlling *Aedes aegypti* with transgenic methods: a model-based  
591 evaluation. *PLOS ONE*, 7(12):e52235.
- 592 [48] Magori, K., Legros, M., Puente, M. E., Focks, D. A., Scott, T. W., Lloyd, A. L., and Gould, F. (2009).  
593 Skeeter Buster: a stochastic, spatially explicit modeling tool for studying *Aedes aegypti* population  
594 replacement and population suppression strategies. *PLOS Neglected Tropical Diseases*, 3(9):e508.
- 595 [49] Marshall, J. M. (2009). The effect of gene drive on containment of transgenic mosquitoes. *Journal*  
596 *of Theoretical Biology*, 258(2):250–265.
- 597 [50] Marshall, J. M. and Hay, B. A. (2012). Confinement of gene drive systems to local populations: a  
598 comparative analysis. *Journal of Theoretical Biology*, 294:153–171.
- 599 [51] Maynard Smith, J. and Slatkin, M. (1973). The stability of predator-prey systems. *Ecology*,  
600 54(2):384–391.

- 601 [52] McInnis, D. O., Lance, D. R., and Jackson, C. G. (1996). Behavioral resistance to the sterile insect  
602 technique by mediterranean fruit fly (Diptera: Tephritidae) in Hawaii. *Annals of the Entomological*  
603 *Society of America*, 89:739–744.
- 604 [53] Midega, J. T., Mbogo, C. M., Mwnambi, H., Wilson, M. D., Ojwang, G., Mwangangi, J. M., Nzovu,  
605 J. G., Githure, J. I., Yan, G., and Beier, J. C. (2007). Estimating dispersal and survival of *Anopheles*  
606 *gambiae* and *Anopheles funestus* along the Kenyan coast by using mark-release-recapture methods.  
607 *Journal of Medical Entomology*, 44(6):923–929.
- 608 [54] Molineaux, L. and Gramiccia, G. (1980). *The Garki project : research on the epidemiology and*  
609 *control of malaria in the Sudan savanna of West Africa*. World Health Organization, Geneva.
- 610 [55] National Academies of Sciences, E. and Medicine (2016). *Gene Drives on the Horizon: Advancing*  
611 *Science, Navigating Uncertainty, and Aligning Research with Public Values*. The National Academies  
612 Press, Washington, DC.
- 613 [56] North, A., Burt, A., and Godfray, H. C. J. (2013). Modelling the spatial spread of a homing  
614 endonuclease gene in a mosquito population. *Journal of Applied Ecology*, 50(5):1216–1225.
- 615 [57] North, A. and Godfray, H. C. J. (2017). The dynamics of disease in a metapopulation: The role of  
616 dispersal range. *Journal of Theoretical Biology*, 418:57 – 65.
- 617 [58] North, A. R., Burt, A., and Godfray, H. C. J. (2019). Modelling the potential of genetic control of  
618 malaria mosquitoes at national scale. *BMC Biology*, 17(1):26.
- 619 [59] Oluwagbemi, O. O., Fornadel, C. M., Adebisi, E. F., Norris, D. E., and Rasgon, J. L. (2013).  
620 ANOSPEX: a stochastic, spatially explicit model for studying *Anopheles* metapopulation dynamics.  
621 *PLOS ONE*, 8(7):e68040.
- 622 [60] O’Neill, S. L., Ryan, P. A., Turley, A. P., Wilson, G., Retzki, K., Iturbe-Ormaetxe, I., Dong, Y.,  
623 Kenny, N., Paton, C. J., Ritchie, S. A., Brown-Kenyon, J., Stanford, D., Wittmeier, N., Anders, K. L.,  
624 and Simmons, C. P. (2018). Scaled deployment of *Wolbachia* to protect the community from dengue  
625 and other *Aedes* transmitted arboviruses. *Gates Open Res*, 2:36.
- 626 [61] Saarman, N. P., Gloria-Soria, A., Anderson, E. C., Evans, B. R., Pless, E., Cosme, L. V., Gonzalez-  
627 Acosta, C., Kamgang, B., Wesson, D. M., and Powell, J. R. (2017). Effective population sizes of a  
628 major vector of human diseases, *aedes aegypti*. *Evolutionary Applications*, 10(10):1031–1039.
- 629 [62] Sheppard, P. M., Macdonald, W. W., Tonn, R. J., and Grab, B. (1969). The dynamics of an adult  
630 population of *Aedes aegypti* in relation to dengue haemorrhagic fever in bangkok. *Journal of Animal*  
631 *Ecology*, 38(3):661–702.



- 632 [63] Southwood, T. R. E., Murdie, G., Yasuno, M., Tonn, R. J., and Reader, P. M. (1972). Studies on  
633 the life budget of *Aedes aegypti* in Wat Samphaya, Bangkok, Thailand. *Bulletin of the World Health  
634 Organization*, 46(2):211–226.
- 635 [64] Taylor, C., Touré, Y. T., Carnahan, J., Norris, D. E., Dolo, G., Traoré, S. F., Edillo, F. E., and  
636 Lanzaro, G. C. (2001). Gene flow among populations of the malaria vector, *Anopheles gambiae*, in  
637 mali, west africa. *Genetics*, 157(2):743–750.
- 638 [65] Teixeira, L., Ferreira, A., and Ashburner, M. (2008). The bacterial symbiont *Wolbachia* induces  
639 resistance to RNA viral infections in *Drosophila melanogaster*. *PLOS Biology*, 6(12):e2.
- 640 [66] Thomson, M. C., Connor, S. J., Quinones, M. L., Jawara, M., Todd, J., and Greenwood, B. M.  
641 (1995). Movement of *Anopheles gambiae* s.l. malaria vectors between villages in The Gambia. *Medical  
642 and Veterinary Entomology*, 9(4):413–419.
- 643 [67] Touré, Y. T., Dolo, G., Petrarca, V., Traoré, Bouaré, Dao, A., Carnahan, J., and Taylor, C. E.  
644 (1998). Mark–release–recapture experiments with *Anopheles gambiae* s.l. in Banambani Village, Mali,  
645 to determine population size and structure. *Medical and Veterinary Entomology*, 12(1):74–83.
- 646 [68] Unckless, R. L., Clark, A. G., and Messer, P. W. (2017). Evolution of Resistance Against  
647 CRISPR/Cas9 Gene Drive. *Genetics*, 205(2):827–841.
- 648 [69] WHO (2017). *Global Vector Control Response 2017–2030*. World Health Organization, Geneva.
- 649 [70] WHO (2017). Technical advisory meeting on risk assessment frameworks for genetically modified  
650 *Aedes aegypti* mosquitoes. Venue: HQ, Geneva, Switzerland.
- 651 [71] WHO/TDR and FNIH (2014). The guidance framework for testing genetically modified mosquitoes.  
652 pp159.
- 653 [72] Williams, C. R., Johnson, P. H., Long, S. A., Rapley, L. P., and Ritchie, S. A. (2008). Rapid  
654 estimation of *Aedes aegypti* population size using simulation modeling, with a novel approach to  
655 calibration and field validation. *Journal of Medical Entomology*, 45(6):1173–1179.
- 656 [73] World Bank (2016). The short-term economic costs of zika in latin american and the caribbean.  
657 Accessed: 28-April-2018.
- 658 [74] Yakob, L., Alphey, L., and Bonsall, M. B. (2008). *Aedes aegypti* control: the concomitant role of  
659 competition, space and transgenic technologies. *Journal of Applied Ecology*, 45(4):1258–1265.
- 660 [75] Yakob, L. and Yan, G. (2010). A network population model of the dynamics and control of African  
661 malaria vectors. *Transactions of The Royal Society of Tropical Medicine and Hygiene*, 104(10):669–675.
- 662 [76] Zhang, X. H., Tee, L. Y., Wang, X. G., Huang, Q. S., and Yang, S. H. (2015). Off-target Effects in  
663 CRISPR/Cas9-mediated Genome Engineering. *Molecular Therapy Nucleic Acids*, 4:e264.
